# Supplementary material for: Streptinone, a New Indanone Derivative from a Marine-Derived Streptomyces massiliensis, Inhibits Particulate Matter-Induced Inflammation
Source: MDPI journal article supplement (doi:10.3390/md21120640), 2023-12-14
Supplement: s1 [file s1]

## Streptinone, a New Indanone Derivative from a Marine-Derived *Streptomyces massiliensis*, Inhibits Particulate Matter-Induced Inflammation

Hwa-Sun Lee <sup>1,2</sup>, Dineth Pramuditha Nagahawatta <sup>3</sup>, You-Jin Jeon <sup>3</sup>, Min Ah Lee <sup>1,2</sup>, Chang-Su Heo <sup>1,4</sup>, Sun Joo Park <sup>2</sup>, and Hee Jae Shin <sup>1,4,\*</sup>

### Contents

|                                                                                                                  |    |
|------------------------------------------------------------------------------------------------------------------|----|
| Figure S1. <sup>1</sup> H NMR spectrum of compound <b>1</b> (600 MHz, CD <sub>3</sub> OD). .....                 | S2 |
| Figure S2. <sup>13</sup> C NMR spectrum of compound <b>1</b> (150 MHz, CD <sub>3</sub> OD). .....                | S2 |
| Figure S3. HSQC spectrum of compound <b>1</b> in CD <sub>3</sub> OD.....                                         | S3 |
| Figure S4. COSY spectrum of compound <b>1</b> in CD <sub>3</sub> OD.....                                         | S3 |
| Figure S5. HMBC spectrum of compound <b>1</b> in CD <sub>3</sub> OD.....                                         | S4 |
| Figure S6. 1D selective NOESY spectrum of compound <b>1</b> in CD <sub>3</sub> OD (irradiated at H-9).....       | S4 |
| Figure S7. 1D selective NOESY spectrum of compound <b>1</b> in CD <sub>3</sub> OD (irradiated at H-8-Me).....    | S5 |
| Figure S8. HR-ESIMS spectrum of compound <b>1</b> . .....                                                        | S6 |
| Figure S9. <sup>1</sup> H NMR spectrum of cyclo (Gly-L-Leu) ( <b>2</b> ) (600 MHz, CD <sub>3</sub> OD). .....    | S7 |
| Figure S10. <sup>1</sup> H NMR spectrum of cyclo (L-Tyr-D-Pro) ( <b>3</b> ) (600 MHz, CD <sub>3</sub> OD). ..... | S7 |
| Figure S11. <sup>1</sup> H NMR spectrum of cyclo (L-Phe-D-Pro) ( <b>4</b> ) (600 MHz, CD <sub>3</sub> OD).....   | S8 |
| Figure S12. <sup>1</sup> H NMR spectrum of piericidin A ( <b>5</b> ) (600 MHz, CDCl <sub>3</sub> ). .....        | S8 |

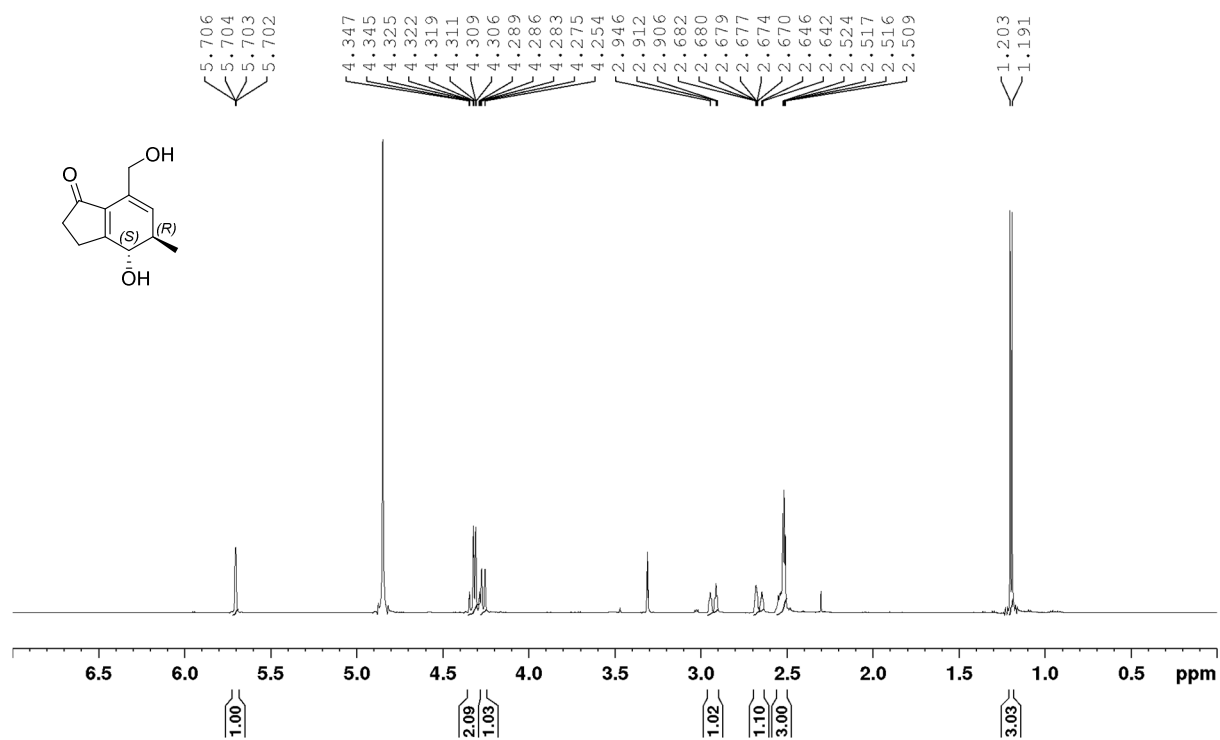

**Figure S1.** <sup>1</sup>H NMR spectrum of compound **1** (600 MHz, CD<sub>3</sub>OD).

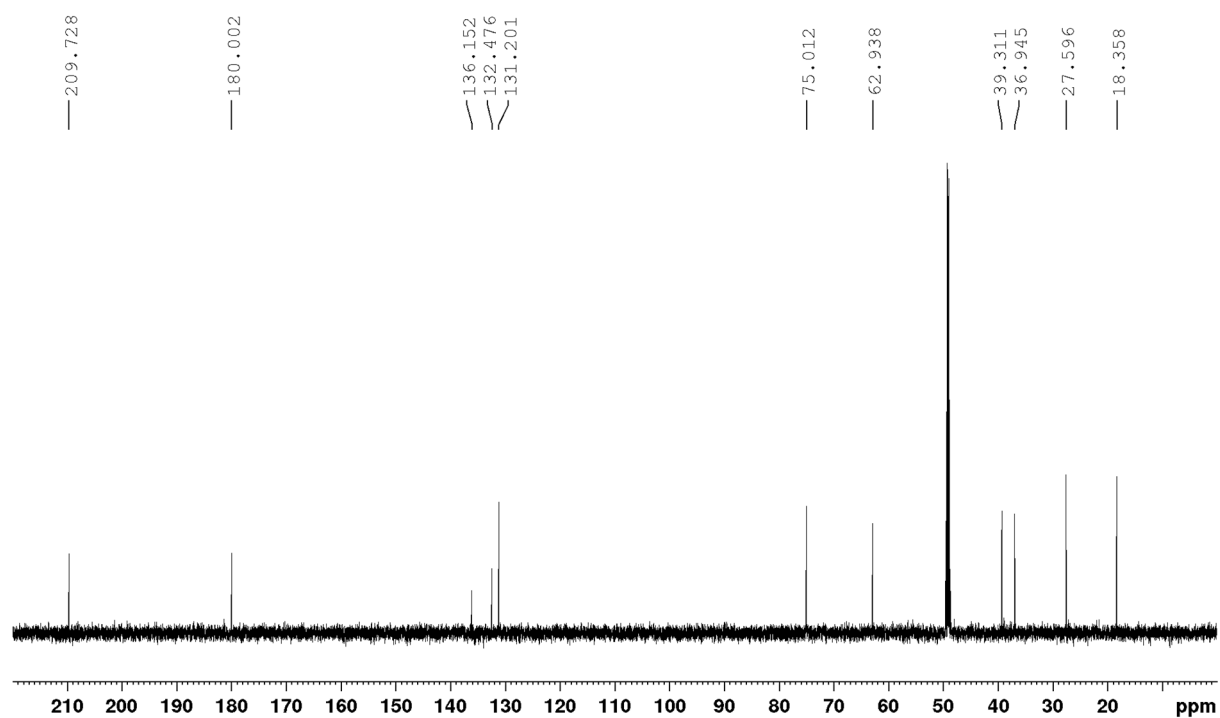

**Figure S2.** <sup>13</sup>C NMR spectrum of compound **1** (150 MHz, CD<sub>3</sub>OD).

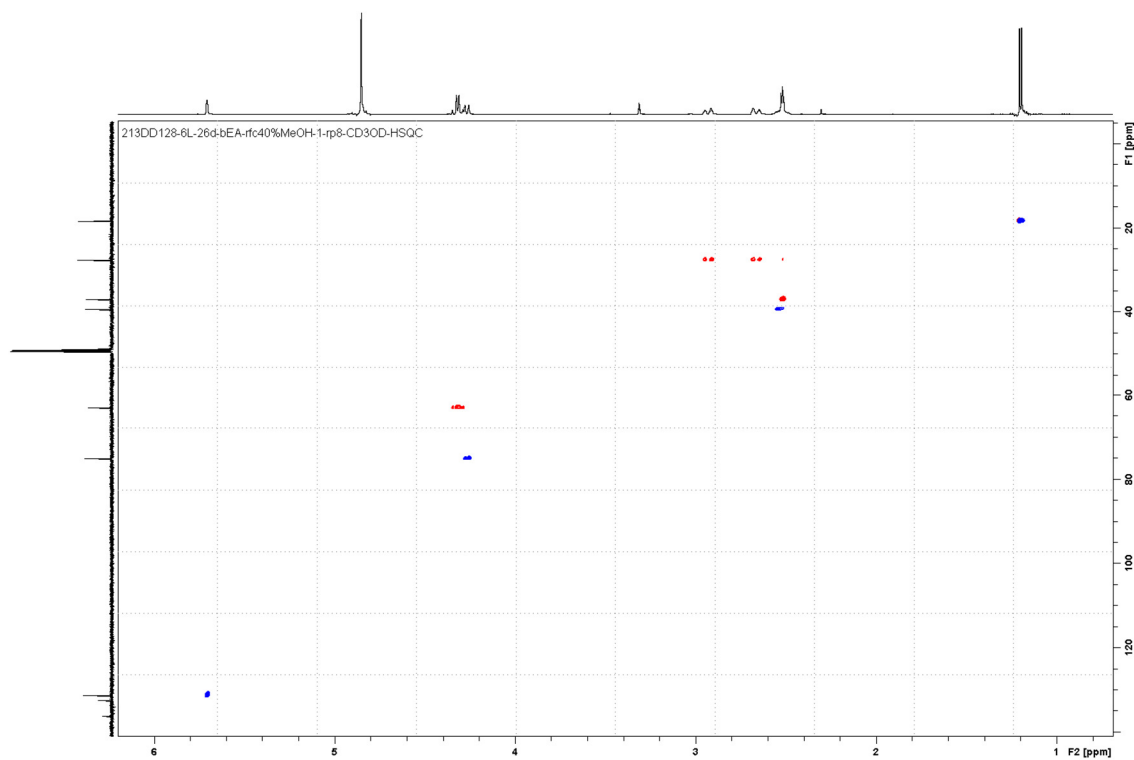

**Figure S3.** HSQC spectrum of compound **1** in CD<sub>3</sub>OD.

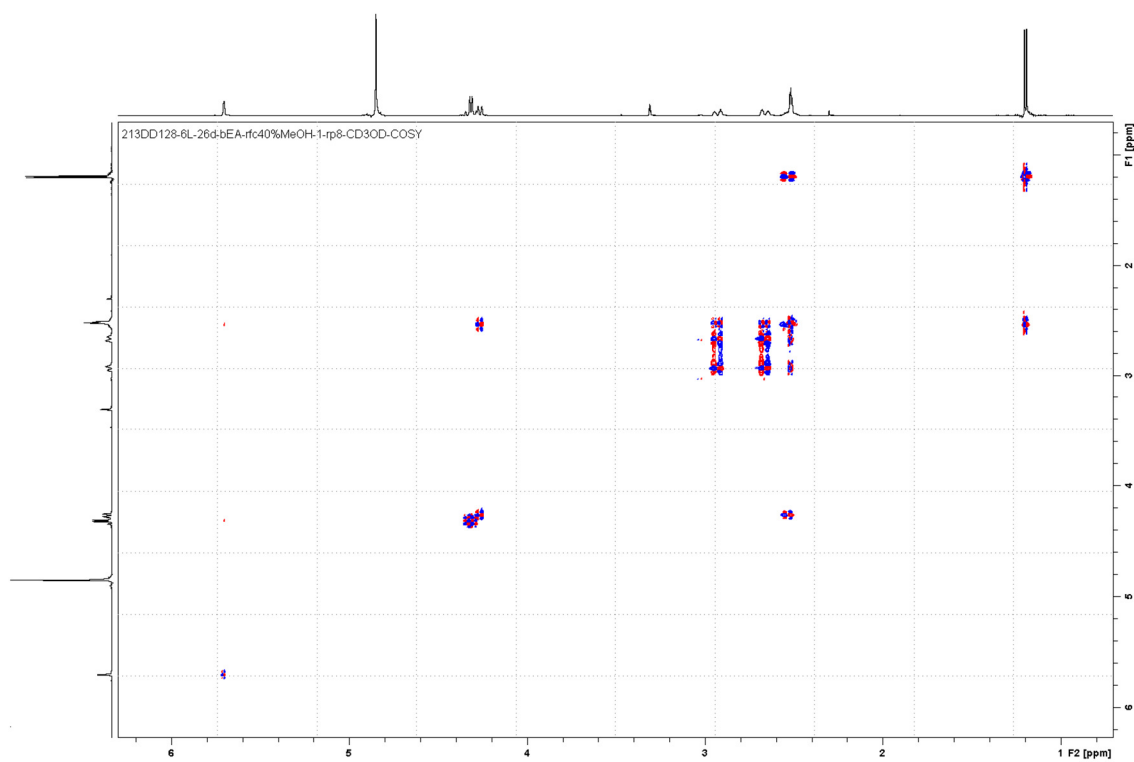

**Figure S4.** COSY spectrum of compound **1** in CD<sub>3</sub>OD.

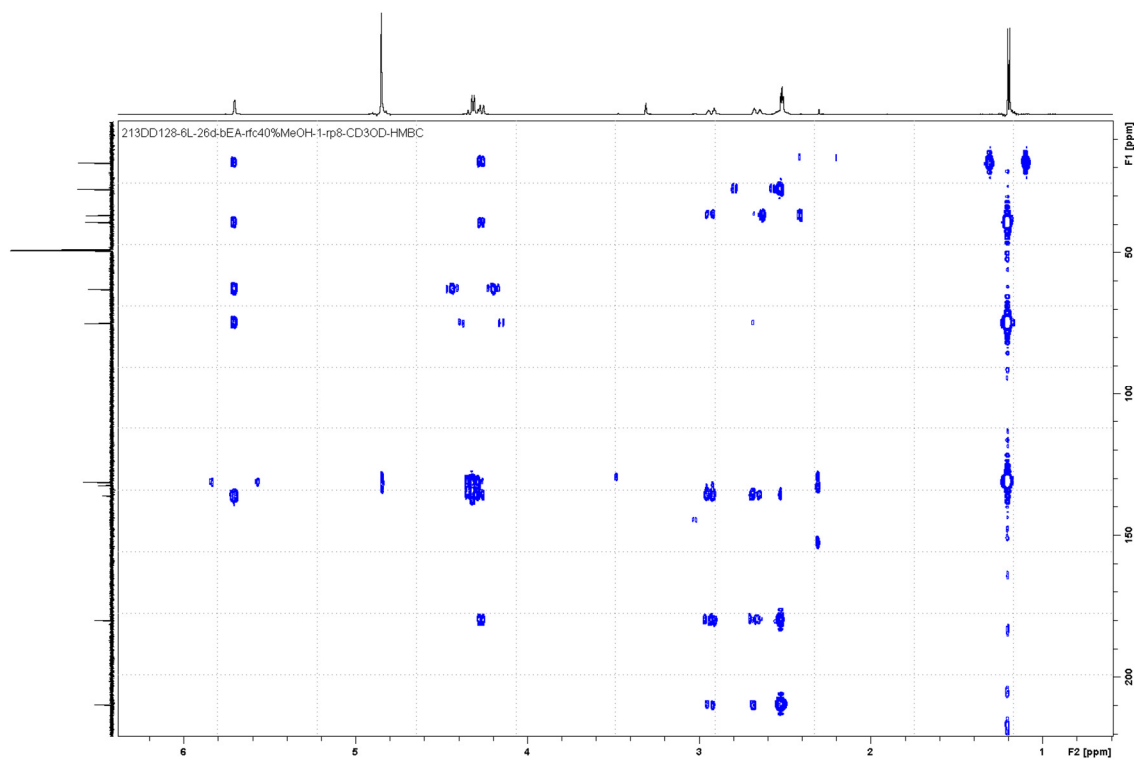

**Figure S5.** HMBC spectrum of compound **1** in CD<sub>3</sub>OD.

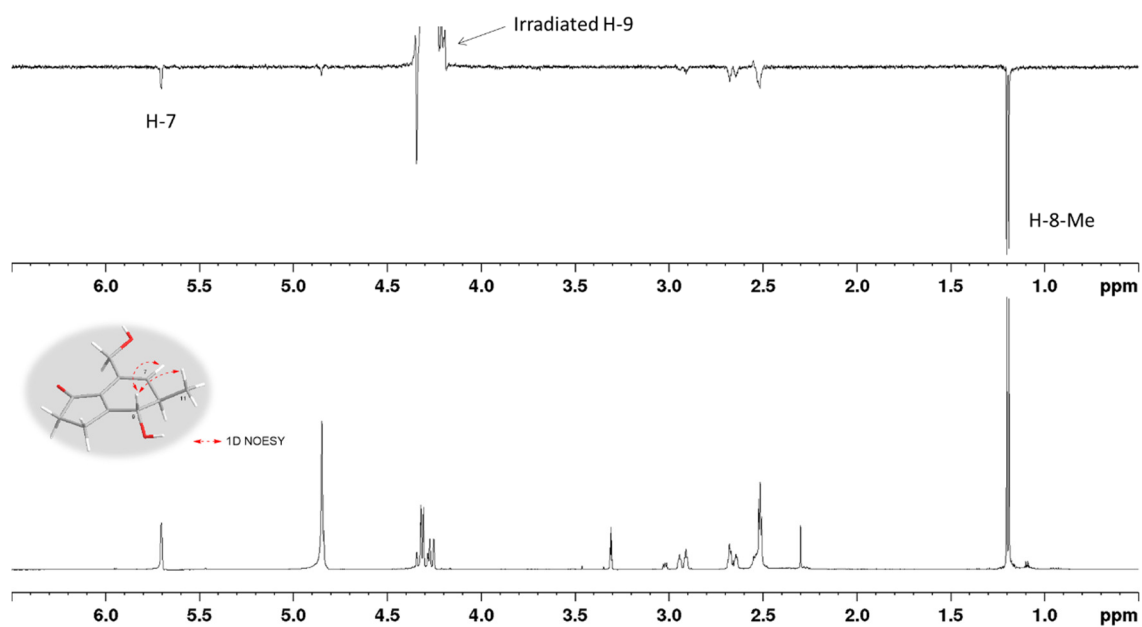

**Figure S6.** 1D selective NOESY spectrum of compound **1** in CD<sub>3</sub>OD (irradiated at H-9).

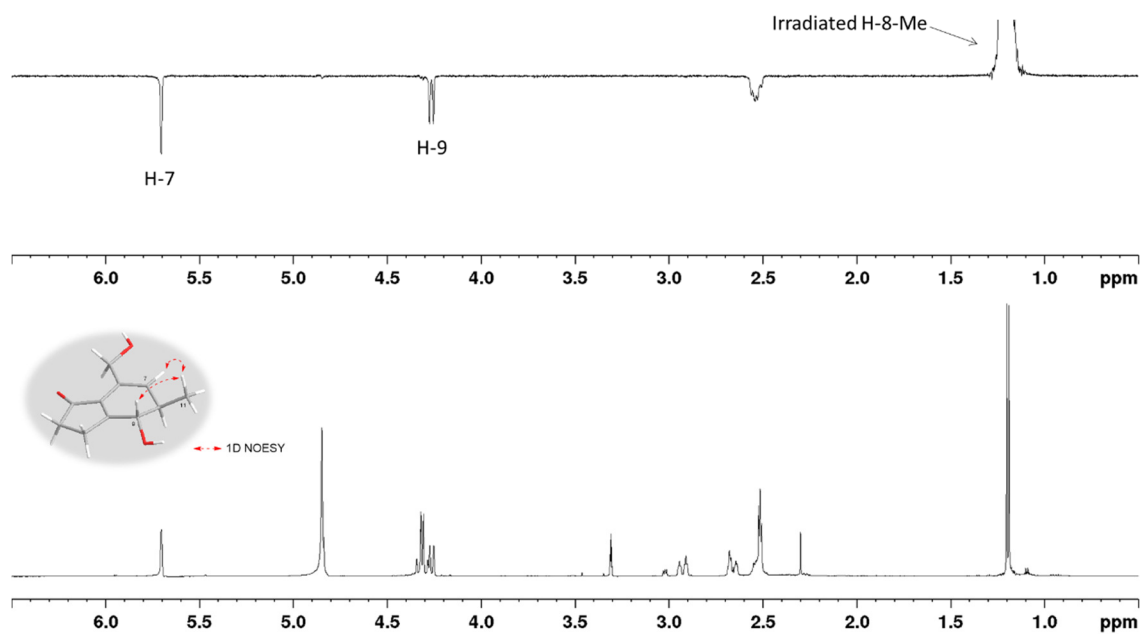

**Figure S7.** 1D selective NOESY spectrum of compound **1** in CD<sub>3</sub>OD (irradiated at H-8-Me).

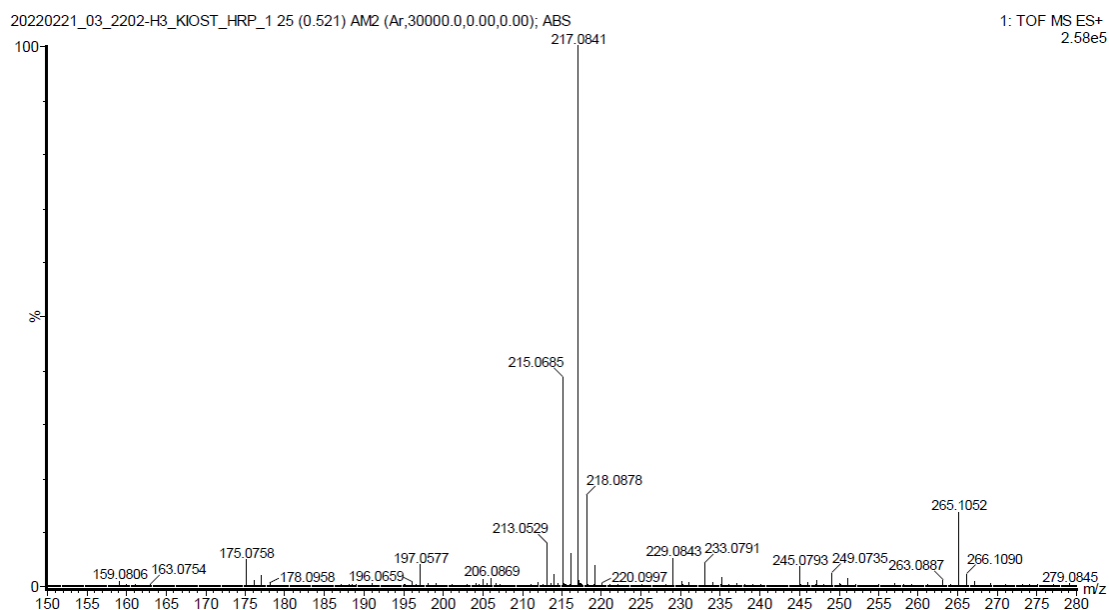

#### Elemental Composition Report

Single Mass Analysis  
Tolerance = 5.0 PPM / DBE: min = -3.0, max = 200.0  
Element prediction: Off  
Number of isotope peaks used for i-FIT = 3

Monoisotopic Mass, Even Electron Ions

Elements Used:

C: 0-31 H: 0-50 O: 0-7 Na: 0-1

Minimum:

Maximum: 300.0 5.0 -3.0 200.0

| Mass     | Calc. Mass | mDa | PPM | DBE | i-FIT  | Norm | Conf(%) | Formula       |
|----------|------------|-----|-----|-----|--------|------|---------|---------------|
| 217.0841 | 217.0841   | 0.0 | 0.0 | 4.5 | 1193.0 | n/a  | n/a     | C11 H14 O3 Na |
| 215.0685 | 215.0684   | 0.1 | 0.5 | 5.5 | 1197.9 | n/a  | n/a     | C11 H12 O3 Na |

**Figure S8.** HR-ESIMS spectrum of compound 1.

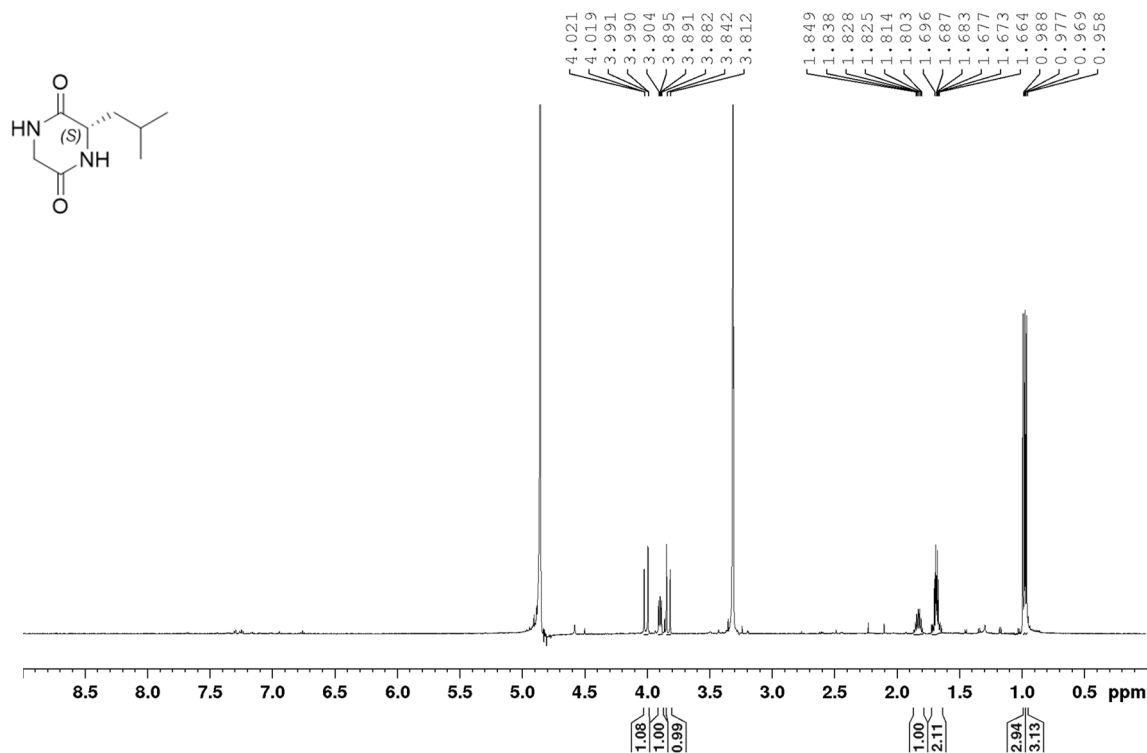

**Figure S9.** <sup>1</sup>H NMR spectrum of cyclo (Gly-L-Leu) (**2**) (600 MHz, CD<sub>3</sub>OD).

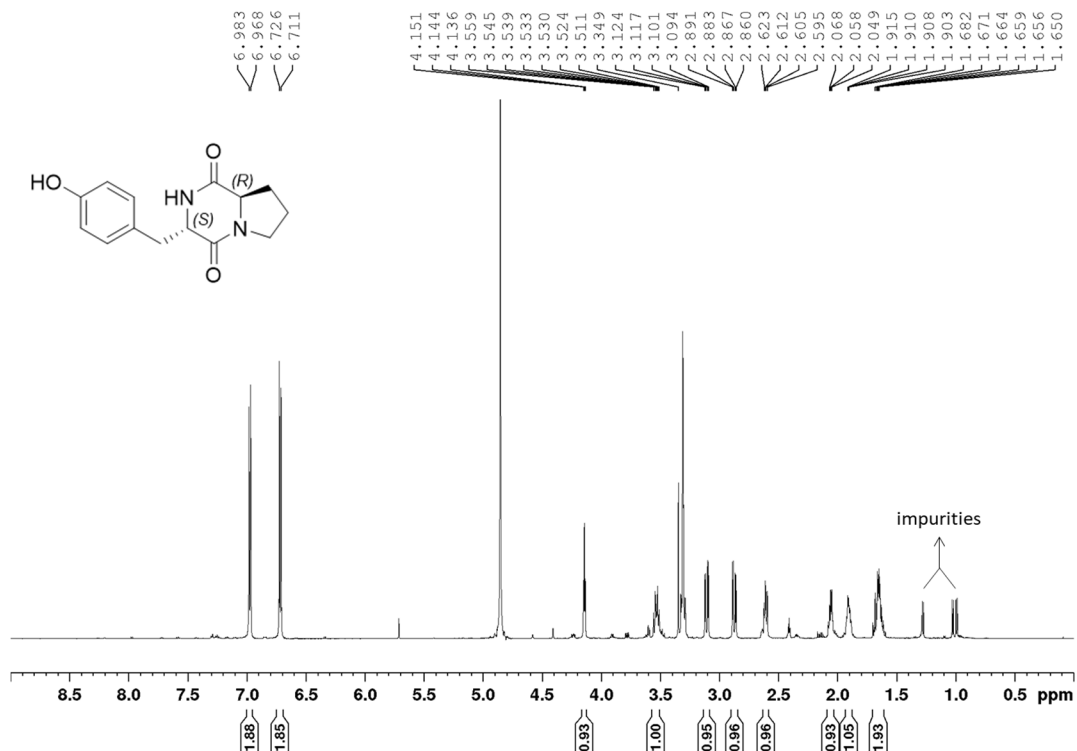

**Figure S10.** <sup>1</sup>H NMR spectrum of cyclo (L-Tyr-D-Pro) (**3**) (600 MHz, CD<sub>3</sub>OD).

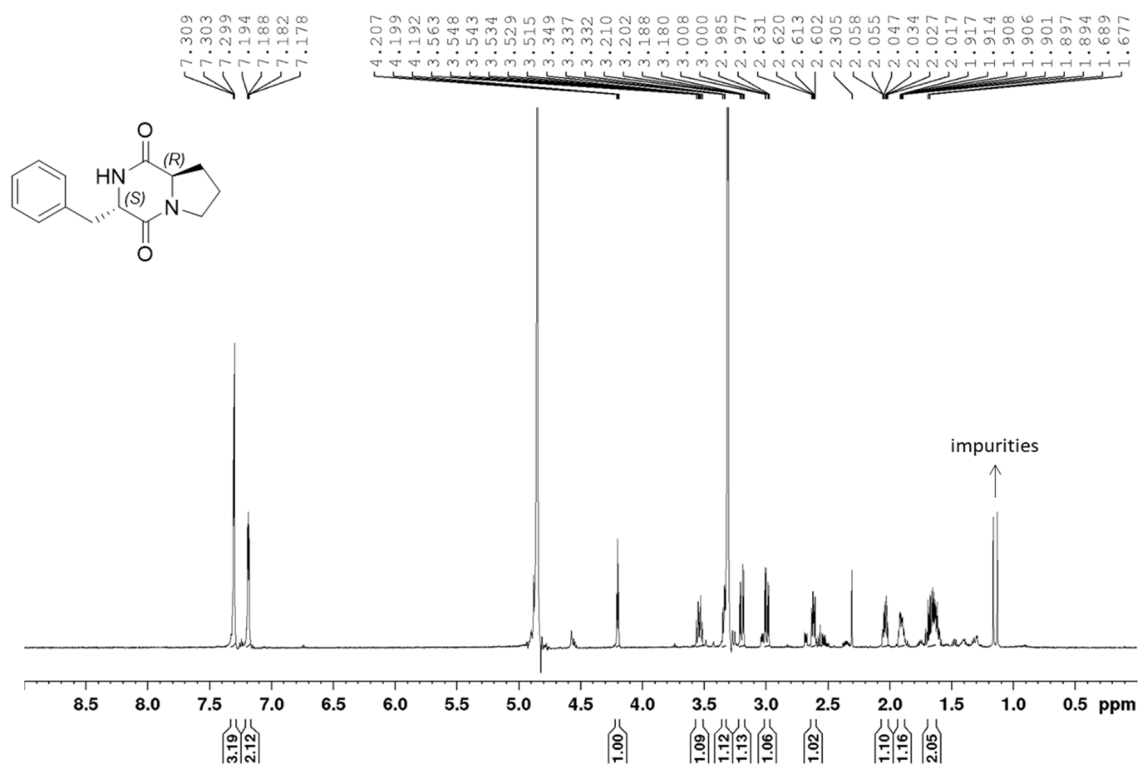

**Figure S11.** <sup>1</sup>H NMR spectrum of cyclo (L-Phe-D-Pro) (**4**) (600 MHz, CD<sub>3</sub>OD).

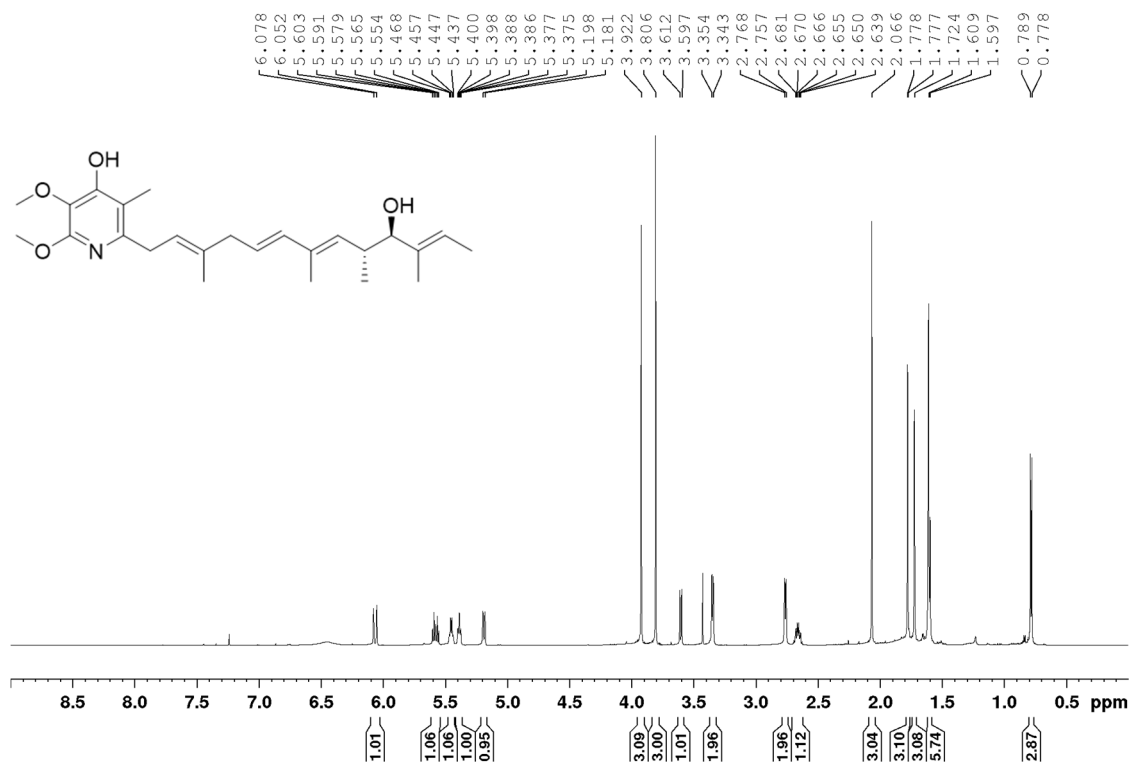

**Figure S12.** <sup>1</sup>H NMR spectrum of piericidin A (**5**) (600 MHz, CDCl<sub>3</sub>).
